# Supplementary material for: Distinct amorphization resistance in high-entropy MAX-phases (Ti, M)2AlC (M=Nb, Ta, V, Zr) under in situ irradiation
Source: Springer Nature journal article supplement (doi:10.1038/s41524-024-01370-y), 2024-08-30
Supplement: 41524_2024_1370_MOESM1_ESM.pdf [file 41524_2024_1370_MOESM1_ESM.pdf]

## Supplementary Information

### Distinct Amorphization Resistance in High-entropy MAX-phases (Ti, M)<sub>2</sub>AlC (M=Nb, Ta, V, Zr) Under *in situ* Irradiation

Hao Xiao <sup>a,1</sup>, Shuang Zhao <sup>a,1</sup>, Jun Zhang <sup>b,1</sup>, Shijun Zhao <sup>b</sup>, Youbing Li <sup>c</sup>, Ke Chen <sup>c</sup>,  
Liuxuan Cao <sup>d</sup>, Yugang Wang <sup>a</sup>, Qing Huang <sup>c</sup>, Chenxu Wang <sup>a,\*</sup>

<sup>a</sup> State Key Laboratory of Nuclear Physics and Technology, Center for Applied Physics and Technology, Peking University, Beijing 100871, China.

<sup>b</sup> Department of Mechanical Engineering, City University of Hong Kong, Hong Kong 999077, China

<sup>c</sup> Ningbo Institute of Material Technology & Engineering, Chinese Academy of Sciences (CAS), Ningbo 315201, China

<sup>d</sup> College of Energy, Xiamen University, Xiamen 361102, China

#### Supplementary Note 1. Phase contrast simulation of the fcc-phase

Supplementary Figure 1(a) shows the HRTEM micrograph of (TiNbTa)<sub>2</sub>AlC irradiated at a dose of 7.2 dpa (derived from a crystalline area in Fig. 3(d)), which exhibits an fcc-structure with ABCABC... stacking sequence. Supplementary Figure 1(b) shows the simulated phase contrast image along  $[11\bar{2}0]$  zone axis of a random fcc-(TiNbTa)<sub>2</sub>AlC SQS supercell (solid-solution in cation sites, as shown in Supplementary Figure 1(c)) via the QSTEM program, the thickness and defocus are set as 4.5 nm and -61.3 nm, respectively. It is revealed that the simulation result is consistent with the experimental HRTEM micrograph. Phase-contrast simulation in (TiNbTaVZr)<sub>2</sub>AlC shows analogous results (not presented in the manuscript).

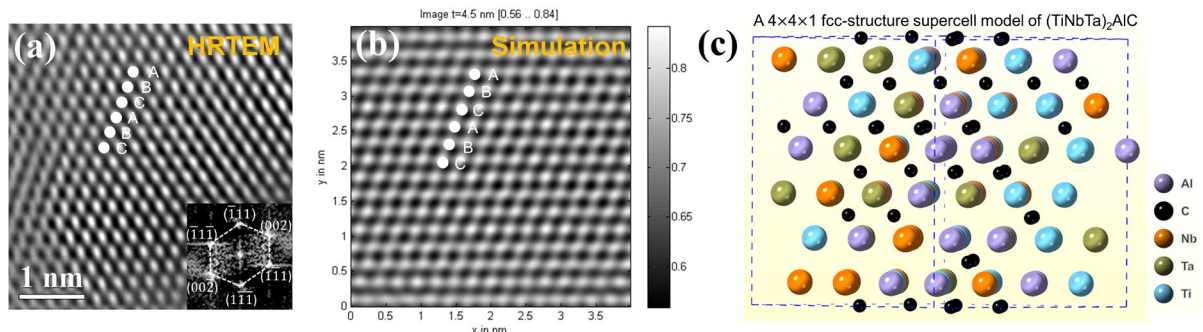

<sup>1</sup> These authors contributed equally to this work.

Supplementary Figure 1 (a) HRTEM micrograph of  $(\text{TiNbTa})_2\text{AlC}$  irradiated at a dose of 7.2 dpa, with an fcc-structure (crystalline area in Fig. 3(d)). The electron beam is along  $[11\bar{2}0]$  direction and inset shows the corresponding FFT image. (b) The simulated phase contrast image along  $[11\bar{2}0]$  zone axis (thickness and defocus set as 4.5 nm and -61.3 nm, respectively) of the fcc- $(\text{TiNbTa})_2\text{AlC}$  supercell via the QSTEM program. (c) A  $4\times 4\times 1$  fcc-structure supercell model of  $(\text{TiNbTa})_2\text{AlC}$  used for the phase contrast simulation.

### Supplementary Note 2. Proportion of the elemental components:

The proportion of the elemental components in  $(\text{TiNbTa})_2\text{AlC}$  and  $(\text{TiNbTaVZr})_2\text{AlC}$  is given in the Supplementary Table 1, which is cited from Ref 1<sup>1</sup>. The proportions of the elemental components in the M-site of  $(\text{TiNbTa})_2\text{AlC}$  and  $(\text{TiNbTaVZr})_2\text{AlC}$  are close.

**Supplementary Table 1:** The elemental proportion of  $(\text{TiNbTa})_2\text{AlC}$  and  $(\text{TiNbTaVZr})_2\text{AlC}$ <sup>1</sup>

|                                  | Elemental proportion (at.%) |      |      |      |      |       |       |
|----------------------------------|-----------------------------|------|------|------|------|-------|-------|
|                                  | Ti                          | Nb   | Ta   | V    | Zr   | Al    | C     |
| $(\text{TiNbTa})_2\text{AlC}$    | 7.97                        | 8.50 | 7.90 | -    | -    | 11.54 | 64.09 |
| $(\text{TiNbTaVZr})_2\text{AlC}$ | 6.82                        | 7.55 | 7.85 | 6.22 | 4.51 | 14.59 | 52.46 |

## Supplementary References

- 1 Chen, L. *et al.* Multiprincipal Element M<sub>2</sub>FeC (M = Ti, V, Nb, Ta, Zr) MAX Phases with Synergistic Effect of Dielectric and Magnetic Loss. *Advanced Science* **10**, doi:10.1002/advs.202206877 (2023).
